# Supplementary material
Source: PubMed Central journal article supplement (PMC6294928)
Supplement: pnas.1716349115.sapp.pdf [file pnas.1716349115.sapp.pdf]

## Supplementary Information

### Materials and Methods

#### Cell culture

Chicken DT40 cells were cultured at 39.5 °C in a 5 % CO<sub>2</sub> atmosphere in RPMI1640 medium supplemented with 10 % heat-inactivated fetal bovine serum (FBS), 1 % chicken serum, 10 µM β-mercaptoethanol, 100 U/ml penicillin, 100 µg/ml streptomycin and 2 µmol/ml l-glutamine.

TK6 cells were grown in RPMI 1640 medium (Nacalai Tesque Inc., Kyoto, Japan) supplemented with 10% heat-inactivated horse serum (Gibco, Life technologies, New Zealand), 200 µg/ml sodium pyruvate and 100 U/ml penicillin, 100 µg/ml streptomycin at 37° C in 5% CO<sub>2</sub> atmosphere. All mutants analysed in this manuscript are shown in Table S1.

#### Construction of gene-disrupted DT40 clones

Targeting constructs were designed and prepared as described previously (1), using standard molecular biology techniques. Targeting constructs were linearized by overnight digestion with *ScaI* and purified by ethanol precipitation and chloroform extraction. *Wild-type* DT40 cells were electroporated with 40 µg targeting construct, diluted in 96-well plates and incubated for six days. Single colonies were collected for further analysis.

The targeting construct for the *PIAS1* gene was constructed in the following manner. An upstream region of homology was amplified using primers F1 and R1 (Table S2) and ligated into pTOPO. This plasmid was digested with *SalI* and *BamHI* and ligated into the corresponding sites of pBS to create pMS1. The downstream region of homology was amplified using primers F2 and R2, ligated into pTOPO, digested with *BamHI* and *NotI*, and ligated into the same sites of pBS to create pMS2. The *BamHI-NotI* fragment from pMS2 was ligated into pMS1 digested with the same enzymes. The blasticidin and puromycin resistance genes were cloned into the *BamHI* site to generate the final targeting constructs.

To create the *PIAS4* targeting construct, an upstream region of homology was amplified by PCR using primers F3 and R3 and cloned into pTOPO. The plasmid was

digested with *XhoI* and *BglIII* and the fragment was ligated into the same sites in pBS. The downstream arm of homology was amplified using primers F4 and R4, ligated into pTOPO, digested with *SpeI* and *BamHI* and ligated into the same sites in pBS. The drug resistance markers were isolated from their vectors with *BamHI* and cloned into the same site in pMS3 to create pBS::Right::Drug. The Right::Drug fragment was liberated by digestion with *EcoRI* whilst pBS::Left was digested with *BglIII* and *XhoI*. Both DNAs were treated with the Klenow fragment and ligated to generate the targeting constructs.

The *PIAS1* targeting constructs contained the same drug resistance markers as the *PIAS4* targeting constructs. The drug resistance markers are flanked by *loxP* sites, and were thus excised from *PIAS4*<sup>-/-</sup> cells by transfecting them with cre-recombinase plasmid using Amaxa transfection system followed by incubating  $1 \times 10^6$  cells/ml with 200 nM tamoxifen to activate the Cre recombinase. This generated the strain *PIAS4*<sup>-/-</sup>/cre, which was used for the construction of the *PIAS1*<sup>-/-</sup>/*PIAS4*<sup>-/-</sup> double mutant. All primers used in this study are shown in Table S2. We confirmed that the desired mutants had been obtained by Southern blot analysis and reverse transcription PCR (Fig. S1)

### **Disruption of *XPA* gene in TK6 cells**

*XPA* gene disruption constructs for TK6 cells, *XPA-his*<sup>R</sup> and *XPA-hygro*<sup>R</sup> were generated from genomic PCR products combined with *his*<sup>R</sup> and *hygro*<sup>R</sup> selection marker genes. Genomic DNA sequences were amplified using the following primers: F16 and R16 plus F17 and R17 for the left arm and right arm, respectively. Left arm and right arm was inserted into *ApaI* and *AflIII* site of DT-A-pA/*loxP*/PGK-*hygro*<sup>R</sup>-pA/*loxP*, respectively, to create *XPA-hygro*<sup>R</sup> using GENEART Seamless Cloning (Life Technologies, Palo Alto, CA). Similar to *XPA-hygro*<sup>R</sup>, *XPA-his*<sup>R</sup> was generated using DT-A-pA/*loxP*/PGK-*his*<sup>R</sup>-pA/*loxP*. *XPA*<sup>-/-</sup> TK6 cells were generated using clustered regularly interspaced short palindromic repeat (CRISPR) (2). Briefly, guide sequence was inserted into the pX330 vector. The CRISPR-target site is depicted in Fig. S2. TK6 cells were transfected with 2 µg each of targeting vectors (*XPA-hygro*<sup>R</sup> and *XPA-his*<sup>R</sup>) and 6 µg of the guide sequence-containing pX330 vector using NEON Transfection System (Life Technologies) according to the manufacture's instructions. After 48 h, the cells were plated in 96-well plates, and then subjected to hygromycin

and L-histidinol. The drug-resistant cell colonies were picked on days 7-10 after transfection. The loss of *XPA* transcript was confirmed by RT-PCR using F18 and R18 primers.

### **Disruption of *POLH* gene in TK6 cells**

*POLH* gene disruption constructs for TK6 cells, *POLH-neo<sup>R</sup>* and *POLH-puro<sup>R</sup>* were generated from genomic PCR products combined with *neo<sup>R</sup>* and *puro<sup>R</sup>* selection marker genes. Genomic DNA sequences were amplified using the following primers: F13 and R13 plus F14 and R14 for the left arm and right arm, respectively. Left arm and right arm was inserted into *ApaI* and *AflIII* site of DT-A-pA/loxP/PGK-*neo<sup>R</sup>*-pA/loxP, respectively, to create *POLH-neo<sup>R</sup>* using GENEART Seamless Cloning (Life Technologies). Similar to *POLH-neo<sup>R</sup>*, *POLH-puro<sup>R</sup>* was generated using DT-A-pA/loxP/PGK-*puro<sup>R</sup>*-pA/loxP. *POLH<sup>-/-</sup>* TK6 cells were generated using clustered regularly interspaced short palindromic repeat (CRISPR) (2). Briefly, guide sequence was inserted into the pX330 vector. The CRISPR-target site is depicted in Fig. S2. TK6 cells were transfected with 2 µg each of targeting vectors (*POLH-neo<sup>R</sup>* and *POLH-puro<sup>R</sup>*) and 6 µg of the guide sequence-containing pX330 vector using NEON Transfection System (Life Technologies) according to the manufacture's instructions. After 48 h, the cells were plated in 96-well plates, and then subjected to puromycin and neomycin. The drug-resistant cell colonies were picked on days 7-10 after transfection. For the preparation of a probe for Southern blot analysis of gene-disrupted clones, a 0.5 kb genomic DNA fragments was amplified by the F15 and R15 primers. The loss of *POLH* transcript was confirmed by Southern blot analysis.

### **Disruption of *PIAS4* gene in TK6 cells**

To generate human *PIAS4<sup>-/-</sup>* TK6 B cells, we designed a guide RNA targeting 9<sup>th</sup> exon using the Zhang CRISPR tool (2) and gene-targeting constructs. The CRISPR-target site is depicted in Fig. S2. The gene-targeting constructs were generated using SLiCE (Seamless Ligation Cloning Extract). The genomic DNA was amplified with primers F5 and R5 from the *PIAS4*-gene locus and the PCR product was used as template DNA for amplifying the 5' arm. The 5'-arm was amplified using primers F6 and R6, where each primer shared 20-base pair-end homology with the insertion site of the vector. The 3'-arm was amplified using primers F7 and R7, where each primer shared 20-base pair-end homology with the insertion site of the vector. Both vectors, DT-

ApA/neo and DT-ApA/hygro, were linearized with *NotI* and *XbaI*. All the fragments of the vectors and inserts were purified using a qiaquick gel extraction kit (QIAGEN, Netherlands). The gene-targeting constructs were generated in a single reaction mixture containing DT-ApA/neo or DT-ApA/hygro vectors, 5'- and 3'-arms, and 2×SLiCE buffer (Invitrogen, US) and incubated for 30 min at room temperature. 6 µg of CRISPR and 2 µg of each gene-targeting vector were transfected into 4×10<sup>6</sup> TK6 cells using the Neon Transfection System (Life Technologies, US). After electroporation, cells were released into 20 ml drug-free medium containing 10% horse serum. Forty-eight hours later, cells were seeded into 96-well plates for selection with both neomycin and hygromycin antibiotics for two weeks. The gene disruption was confirmed by RT-PCR using primers F8 and R8.

### **Disruption of *PIAS1* gene in TK6 cells**

To generate human *PIAS1*<sup>-/-</sup> TK6 B cells, we designed a guide RNA targeting 8<sup>th</sup> exon using the Zhang CRISPR tool (2) and gene-targeting constructs. The CRISPR-target site is depicted in Fig. S2. The gene-targeting constructs were generated using SLiCE (Seamless Ligation Cloning Extract). The genomic DNA was amplified with primers F9 and R9 from the *PIAS1*-gene locus and the PCR product was used as template DNA for amplifying the 5' arm. The 5'-arm was amplified using primers F10 and R10, where each primer shared 20-base pair-end homology with the insertion site of the vector. The 3'-arm was amplified using primers F11 and R11, where each primer shared 20-base pair-end homology with the insertion site of the vector. Both vectors, DT-ApA/neo and DT-ApA/hygro, were linearized with *NotI* and *XbaI*. All the fragments of the vectors and inserts were purified using a qiaquick gel extraction kit (QIAGEN, Netherlands). The gene-targeting constructs were generated in a single reaction mixture containing DT-ApA/puro or DT-ApA/hisd or DT-ApA/bsr vectors, 5'- and 3'-arms, and 2×SLiCE buffer (Invitrogen, US) and incubated for 30 min at room temperature. 6 µg of CRISPR and 2 µg of two gene-targeting vectors were transfected into 4×10<sup>6</sup> TK6 cells using the Neon Transfection System (Life Technologies, US). After electroporation, cells were released into 20 ml drug-free medium containing 10% horse serum. Forty-eight hours later, cells were seeded into 96-well plates for selection with respective antibiotics for two weeks. The gene disruption was confirmed by RT-PCR using primers F12 and R12.

### **Site-directed mutagenesis of PCNA in *PIAS1*<sup>-/-</sup>/*PIAS4*<sup>-/-</sup> DT40 cells**

The PCNA lysine164 to arginine (*PCNA*<sup>K164R</sup>) mutation in the *PIAS1*<sup>-/-</sup>/*PIAS4*<sup>-/-</sup> cells was inserted as described previously (3).

### **Sensitivity to genotoxic agents**

Cellular sensitivity to genotoxic agents was measured as previously described (4, 5).

### **Surface-IgM-gain assay**

The proportion of surface IgM (sIgM)-positive revertants was monitored by flow-cytometric analysis of cells (6). Single cells were grown clonally following limiting dilution, and expanded for three weeks and then stained with fluorescein isothiocyanate-conjugated (FITC) anti-chicken IgM antibody for 1 h at 37 °C. At least 36 subclones were analysed for each genotype.

### **PiggyBlock assay**

CPD containing plasmid was generated as described previously (7, 8) and was transfected with transposase expression vector into TK6 cells using the Neon transfection system. Transfected cells were subjected to limiting dilution immediately after transfection. Puromycin was added at 48 h after transfection. Genomic DNAs from individual puromycin resistant clones were purified, and were PCR amplified to examine DNA sequences at the CPD lesion. We analyzed them following the method described previously (7).

### **Construction of 6His-hSUMO1 expressing DT40 cells**

For the pull-down experiment, 6His-tagged hSUMO1-expressing DT40 cells were generated using a retroviral vector as described (Fig. S7) (9). Briefly, the coding sequence for 6His-tagged hSUMO1 was cloned into the pMSCV retroviral expression vector (Clontech). The SUMOylation of PCNA is mainly by conjugation with SUMO1, but not SUMO2 or SUMO3, in mammalian cells (10). The newly engineered retroviral expression vector was co-transfected into human 293T cells with a helper plasmid (pClampho) expressing the viral gag, pol and env proteins to produce viral supernatant. The viral supernatant was collected after 24 h and used to transduce into the DT40 cells. The efficiency of each step was assessed by quantifying the

number of cells expressing GFP.

### **Pull-down assay**

Cell pellets were treated with 5 ml lysis buffer (8 M urea, 115 mM NaH<sub>2</sub>PO<sub>4</sub>, 300 mM NaCl, 10 mM Tris-HCl, 0.1% NP-40, 5 mM Imidazole, pH 8.0), and sonicated. The soluble fraction was recovered and mixed and rotated with 50 µl Ni-NTA magnetic beads (Qiagen) overnight at 4° C. The protein samples were washed 3 times with lysis buffer (8 M urea, 115 mM NaH<sub>2</sub>PO<sub>4</sub>, 300 mM NaCl, 10 mM Tris-HCl, 0.1% NP-40, 5 mM Imidazole, pH 8.0), mixed with 50 µl elution buffer (200 mM Imidazole, 5% SDS, 150 mM Tris-HCl pH 6.7, 30% glycerol, 720 mM β-ME, and 0.0025 bromophenol blue) for 20 min at room temperature and then boiled for 2 min. After running the supernatants in a 12% SDS-Gel, the proteins were electro-blotted onto a PVDF membrane. Anti-PCNA antibody (PC10, Santa Cruz) for overnight at 4 °C and anti-mouse IgG HRP-linked antibody (Santa Cruz) for 1 h at room temperature were used as the primary and secondary antibodies, respectively.

### **Quantification of SUMOylated PCNA**

SUMOylated PCNA was quantified from the image of the western blot (WB) using ImageJ software. First, the lowest value for SUMOylated PCNA (*wild-type* DT40 cells without the hSUMO1 transgene) was assumed to be the background noise, and this value was subtracted from all other values. In the second step, the signals for each immuno-precipitated sample on the anti-PCNA blot at the positions of SUMOylated PCNA were normalized according to the signals (unmodified PCNA) obtained from the anti-PCNA blot for whole cell extracts (WCE), to account for sample loading variations. In the last step, all values were normalized to the value of SUMOylated PCNA in His-hSUMO1 expressing *wild-type* cells, and set to 1.00.

### **Construction of Flag-tagged hPCNA and Flag-tagged hPCNA-hSUMO1 expressing DT40 and TK6 cell lines**

Flag-tagged hPCNA and Flag-tagged hPCNA-hSUMO1 plasmids (10) were used to generate Flag-tagged hPCNA and Flag-tagged hPCNA-hSUMO1 expressing DT40 cells. These plasmids were modified by insertion of *hygro<sup>R</sup>* gene into the plasmid. Cells were selected with hygromycin antibiotic after transfection with linearized

plasmids using Bio-Rad transfection system. The expression of chimera was confirmed by western blot (WB) using anti-PCNA antibody for overnight at 4°C and anti-mouse IgG HRP-linked antibody for 1h at room temperature were used as the primary and secondary antibodies respectively (Fig. S8). Flag-tagged hPCNA and Flag-tagged hPCNA-hSUMO1 expressing TK6 cells were generated using a genetically modified retroviral vector as described (9). Briefly, the chimeric gene was cloned into the pMSCV retroviral expression vector (Clontech). The newly engineered retroviral expression vector was co-transfected into human 293T cells with a helper plasmid (pClampho) expressing the viral gag, pol and env proteins to produce viral supernatant. The viral supernatant was collected after 48h and used to transduce into *wild-type*, *PIAS1*<sup>-/-</sup>*PIAS4*<sup>-/-</sup> TK6 cells (Fig. S9). The efficiency of each step was assessed by quantifying the number of cells expressing GFP (Fig. S9).

### **Construction of Flag-tagged mutated hSUMO1-hPCNA expressing TK6 cell lines**

We replaced key amino acids of SUMO involved in interaction with SIM (11) (Fig. S10A), generating Flag-hPCNA-hSUMO1<sup>F36A</sup>, Flag-hPCNA-hSUMO1<sup>V38A</sup>, and Flag-hPCNA-hSUMO1<sup>K39A</sup>. We also generated Flag-hPCNA-hSUMO1<sup>4A</sup> by replacing all three amino acids, Phe36, Val38, and Lys39, plus an additional amino acid, Thr42 to alanine. We established TK6 cells expressing Flag-tagged mutated hSUMO1-hPCNA as we generated TK6 cells expressing Flag-tagged hPCNA. The efficiency of each step was assessed by quantifying the number of cells expressing GFP (Fig. S10).

### **References**

1. Sambrook J, Fritsch EF, Maniatis T (1989) *Molecular Cloning: A Laboratory Manual*. Cold Spring Harbor laboratory press.
2. Ran FA, et al. (2013) Double nicking by RNA-guided CRISPR cas9 for enhanced genome editing specificity. *Cell* 154(6):1380–1389.
3. Saberi A, et al. (2008) The 9-1-1 DNA clamp is required for immunoglobulin gene conversion. *Mol Cell Biol*. doi:10.1128/MCB.00156-08.
4. Mohiuddin, et al. (2016) The role of HERC2 and RNF8 ubiquitin E3 ligases in the promotion of translesion DNA synthesis in the chicken DT40 cell line. *DNA Repair (Amst)*. doi:10.1016/j.dnarep.2016.02.002.
5. Keka IS, et al. (2015) Smarcal1 promotes double-strand-break repair by

nonhomologous end-joining. *Nucleic Acids Res*:1–14.

6. Buerstedde JM, et al. (1990) Light chain gene conversion continues at high rate in an ALV-induced cell line. *EMBO J*.
7. Cohen IS, et al. (2015) DNA lesion identity drives choice of damage tolerance pathway in murine cell chromosomes. *Nucleic Acids Res* 43(3):1–9.
8. Hirota K, et al. (2016) In vivo evidence for translesion synthesis by the replicative DNA polymerase ?? *Nucleic Acids Res*. doi:10.1093/nar/gkw439.
9. Mohiuddin, et al. (2014) A novel genotoxicity assay of carbon nanotubes using functional macrophage receptor with collagenous structure (MARCO)-expressing chicken B lymphocytes. *Arch Toxicol*. doi:10.1007/s00204-013-1084-7.
10. Gali H, et al. (2012) Role of SUMO modification of human PCNA at stalled replication fork. *Nucleic Acids Res* 40(13):6049–6059.
11. Hecker CM, Rabiller M, Haglund K, Bayer P, Dikic I (2006) Specification of SUMO1- and SUMO2-interacting motifs. *J Biol Chem*. doi:10.1074/jbc.M512757200.
12. Fagarasan S, Kinoshita K, Muramatsu M, Ikuta K, Honjo T (2001) In situ class switching and differentiation to IgA-producing cells in the gut lamina propria. *Nature* 413(6856):639–643.

## Supplemental Figure legends

### Fig. S1. Targeted disruption of *PIAS1* and *PIAS4* genes in chicken DT40 cells.

(A) Schematic representation of part of the *PIAS1* gene. The SUMO ligase domain was deleted by gene targeting. The locations of *Bam*HI sites used for Southern blot verification of mutants are indicated. Hybridizing bands of 10.1 kb and 6.3 kb are predicted for *wild-type* and mutant alleles, respectively, based on sequence data. (B) Schematic representation of part of the *PIAS4* gene. *Apa*I sites used for Southern blotting are indicated, and bands of 11.4 kb and 10.7 kb are predicted for the *wild-type* and mutant strains, respectively. (C) Southern blot verification of mutant construction. Genomic DNA isolated from drug-resistant cells was digested with either *Bam*HI (for *PIAS1*) or *Apa*I (for *PIAS4*) and incubated with radio-labelled probes shown in (A) and (B). The genotypes are shown on the top of panels. (D) The upper four panels show reverse-transcription-PCR products derived from the indicated genotypes, using sets of primers shown by reference numbers. The primers hybridize with the indicated exons of the *PIAS1* and *PIAS4* genes. mRNA encoding the targeted exons (open boxes in the schematic) was not detected in the relevant cell lines.

### Fig. S2. Targeted disruption of *XPA*, *POLH*, *PIAS1* and *PIAS4* genes in human TK6 cells.

(A) Schematic representation of the *XPA* locus in TK6 cells and the structure of the gene-targeting constructs. The close solid boxes indicate the coding regions of exons. Arrows are primers used for RT-PCR. (B) *Wild-type* as well as *XPA*<sup>-/-</sup> TK6 cells were subjected to RT-PCR using *GAPDH*- or *XPA*-specific primers. (C) Schematic representation of the human *POLH* locus in TK6 cells and the structure of the gene-targeting constructs. The close solid boxes indicate the coding regions of exons. 'H' indicates relevant *Hind*III site. (D) Southern blot analysis of the *Hind*III-digested genomic DNA from cells carrying the indicated genotypes, using the probe shown in (C). The position and sizes of hybridizing fragments of the *wild-type* and targeted loci are indicated. (E) Schematic representation of the human *PIAS4* locus, target sequences by CRISPR/Cas9, and the gene-targeting construct with a selection marker. The box around ATG indicates the initiation codon. (F) RT-PCR analysis using the forward (F<sub>RT</sub>) and reverse (R<sub>RT</sub>) primers showing *PIAS4* expression only in the *wild-type* cells, but not in the mutants transfected with the gene-targeting construct and

CRISPR/Cas9. GAPDH is used as a loading control. (G) Schematic representation of the human *PIAS1* locus, target sequences by CRISPR/Cas9, and the gene-targeting construct with a selection marker. The box around ATG indicates the initiation codon. (H) RT-PCR analysis using the forward (F<sub>RT</sub>) and reverse (R<sub>RT</sub>) primers showing *PIAS1* expression only in the wild-type cells, but not in the mutants transfected with the gene-targeting construct and CRISPR/Cas9. GAPDH is used as a loading control.

**Fig. S3. SUMO E3 ligase mutants displayed a reduced number of sister-chromatid exchange (SCE) events.** (A-D) SCE induced by 0.25 J/m<sup>2</sup> UV (A) and 10  $\mu$ M cisplatin (B) in the chicken DT40 cells and 0.25 J/m<sup>2</sup> UV (C) and 2  $\mu$ M cisplatin (D) in the human TK6 cells. The distribution of SCE events per cell is shown for the indicated cell samples. At least 50 mitotic cells were analyzed per condition in each experiment. Mean values for SCE before and after exposure to the DNA damaging agents are indicated.

**Fig. S4. Significant decrease in TS relative to TLS in the *PIAS1*<sup>-/-</sup>/*PIAS4*<sup>-/-</sup> TK6 cells.**

(A) Outline of the piggyBlock transposition-based system to analyze TLS past a CPD UV photoproduct CPD placed opposite GpC mismatch in the piggyBlock plasmid carrying the puromycin resistance (puro<sup>R</sup>) gene. After transfection, we immediately did limiting dilution of the cells in 96-well cluster plates. We then selected clones carrying the piggyblock plasmid randomly integrated into the genome after 48 hours using puromycin. Bypass by accurate TLS inserts the correct complementary base (AA) on lower strand at the damaged template base. Alternatively, the nascent strand of the sister chromatid is used as an alternative undamaged template; one possible mechanism for such a template switching illustrated. (B) A UV-damage, CPD placed opposite GpC mismatch was randomly integrated into the genome using the PiggyBlock vector. TLS across the CPD results in a dual peak in the resulting cellular clone (left), while template switching (TS) results in a homogenous GC read (right). (C) Histogram representing the ratio of TS relative to TLS events (y-axis) in the indicated genotypes (x-axis). At least 40 cells were analyzed per condition in each experiment.

**Fig. S5. Site directed mutagenesis of the PCNA locus in *PIAS1*<sup>-/-</sup>/*PIAS4*<sup>-/-</sup> DT40 cells.** (A) Schematic representation of the PCNA mutagenesis construct. (B) Sequence chromatograph covering the PCNA codon 164, which was changed from AAA in the *wild-type* clone to AGA in the *PIAS1*<sup>-/-</sup>/*PIAS4*<sup>-/-</sup>/*PCNA*<sup>K164R/K164R</sup> clone. (C) Damage-independent SUMOylation of PCNA. DT40 Cells stably transfected with His-tagged hSUMO1, were analyzed by pull-down assay using Ni-NTA magnetic beads. (D) Ubiquitylation status of PCNA in the *PIAS1*<sup>-/-</sup>/*PIAS4*<sup>-/-</sup> DT40 cells. After running the whole cell lysates from *wild-type*, *PIAS1*<sup>-/-</sup>/*PIAS4*<sup>-/-</sup> and *PCNA*<sup>K164R/K164R</sup> cells in a 12% SDS-Gel, the proteins were electro-blotted onto a PVDF membrane. Anti-PCNA antibody (PC10, Santa Cruz) for overnight at 4 °C and anti-mouse IgG HRP-linked antibody (Santa Cruz) for 1 h at room temperature were used as the primary and secondary antibodies, respectively.

**Fig. S6. The epistatic relationship of the *PIAS1*<sup>-/-</sup>/*PIAS4*<sup>-/-</sup> mutation with the *PCNA*<sup>K164R/K164R</sup> mutation in Ig gene conversion.**

(A) Rates of Ig gene conversion and non-templated mutation in AID expressing clones carrying the indicated genotypes. Each dashed line represents the V<sub>λ</sub> segment region of an individual cell. The location of gene conversion tracts (GC, horizontal bars), non-templated single base substitutions/point mutations (PM, lollipops) and mutations of ambiguous origin (AMB, vertical bars) are indicated. (B) Charts displaying the frequency of PM, AMB and GC events. Segment size indicates the proportion of cells in which the number of mutations stated outside the chart had occurred. The total number of sequences analyzed is shown in the centre of the chart.

**Fig. S7. Schematic representation of the cloning strategy to create the 6His-tagged human SUMO1 and engineered DT40 strains.**

(A) To construct a retrovirus vector expressing 6His-tagged human SUMO1 (6His-hSUMO1), we replaced the AID cDNA in a pMSCV retroviral expression vector (12) by the 6His-tagged hSUMO1 cDNA. (B) Flow chart illustrating creation of 6-His-tagged hSUMO1-expressing DT40 cells. AID: activation induced deaminase. IRES: internal ribosome entry site. GFP: green fluorescent protein. (C) Expression levels of 6His-tagged hSUMO1 in *wild-type*, *PIAS1*<sup>-/-</sup>/*PIAS4*<sup>-/-</sup> and *PCNA*<sup>K164R/K164R</sup> DT40 cells

were analyzed by flow cytometric analysis. The X-axis of the histogram represents the intensity of green fluorescence.

**Fig. S8. Expression of Flag-hPCNA and Flag-hPCNA-hSUMO1 hybrid genes in the DT40 cells.**

(A) Schematic representation of the Flag-hPCNA and Flag-hPCNA-hSUMO1 hybrid genes. (B) The expression of Flag-hPCNA and Flag-hPCNA-hSUMO1 were confirmed by western blot (WB) using anti-PCNA antibody. Actin is used as a loading control. \* Mono-Ubiquitinated PCNA. (C) The proportion of surface IgM (sIgM)-positive DT40 cells was determined as in Fig. 3B. (D) The number of SCEs induced by 0.25 J/m<sup>2</sup> UV in the DT40 cells was determined as in Fig. 1A. FP: Flag-hPCNA. FPS: Flag-hPCNA-hSUMO1. Statistical analyses were performed by student's t-test ( $P < 0.01$ ).

**Fig. S9. Schematic representation of the cloning strategy to create the Flag-hPCNA and Flag-hPCNA-hSUMO1 hybrid genes and engineered TK6 strains.**

(A) To construct a retrovirus vector expressing Flag-hPCNA or Flag-hPCNA-hSUMO1 hybrid genes, we replaced the AID cDNA in a pMSCV retroviral expression vector (12) by the Flag-hPCNA or Flag-hPCNA-hSUMO1 hybrid genes. (B) Flow chart illustrating creation of Flag-hPCNA or Flag-hPCNA-hSUMO1 - expressing TK6 cells. AID: activation induced deaminase. IRES: internal ribosome entry site. GFP: green fluorescent protein. (C) Expression levels of Flag-hPCNA or Flag-hPCNA-hSUMO1 hybrid genes in *XPA*<sup>-/-</sup>/*POLH*<sup>-/-</sup> and *XPA*<sup>-/-</sup>/*POLH*<sup>-/-</sup>/*PIAS1*<sup>-/-</sup>/*PIAS4*<sup>-/-</sup> TK6 cells were analyzed by flow cytometric analysis. The X-axis of the histogram represents the intensity of green fluorescence.

**Fig. S10. Ectopic expression of mutated hSUMO1-hPCNAs were unable to reverse the mutant phenotype of *PIAS1*<sup>-/-</sup>/*PIAS4*<sup>-/-</sup>/*XPA*<sup>-/-</sup>/*POLH*<sup>-/-</sup> TK6 cells.**

(A) Schematic representation of the Flag tagged mutated hSUMO1-hPCNA hybrid genes. (B) Sequence chromatographs confirmed the insertion of mutation in the hSUMO1-hPCNA hybrid genes. (C) To construct a retrovirus vector expressing Flag tagged mutated hSUMO1-hPCNA hybrid genes, we replaced the AID cDNA in a pMSCV retroviral expression vector (12) by the Flag tagged mutated hSUMO1-hPCNA hybrid genes. (D) Flow chart illustrating creation of Flag tagged mutated

hSUMO-hPCNA-expressing TK6 cells. AID: activation induced deaminase. IRES: internal ribosome entry site. GFP: green fluorescent protein. **(E)** Expression levels of Flag tagged mutated hSUMO1-hPCNA hybrid genes in *XPA*<sup>-/-</sup>/*POLH*<sup>-/-</sup>/*PIAS1*<sup>-/-</sup>/*PIAS4*<sup>-/-</sup> TK6 cells were analyzed by flow cytometric analysis. The X-axis of the histogram represents the intensity of green fluorescence. **(F)** Clonogenic cell survival assay following exposure of mutated hSUMO1-hPCNA expressing *PIAS1*<sup>-/-</sup>/*PIAS4*<sup>-/-</sup>/*XPA*<sup>-/-</sup>/*POLH*<sup>-/-</sup> TK6 cells to UV. The x-axis represents the dose of the indicated DNA-damaging agent on a linear scale; the y-axis represents the survival fraction on a logarithmic scale. Error bars indicate SD.

DT40

A

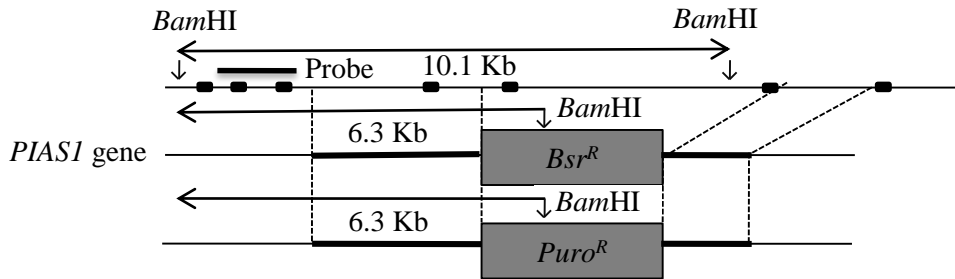

B

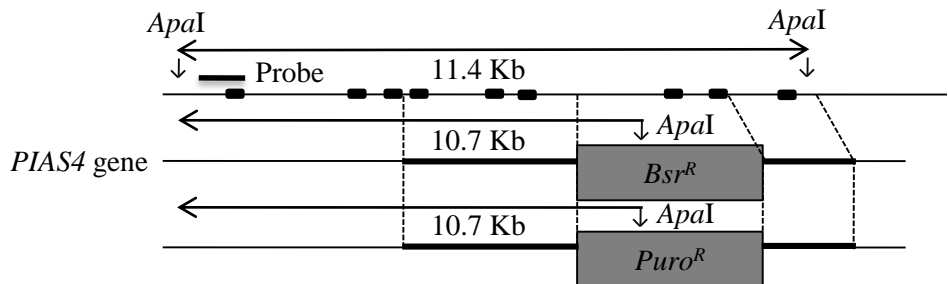

C

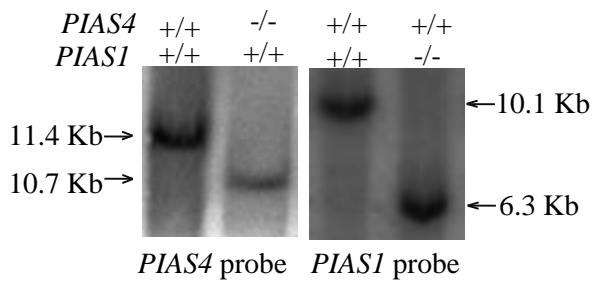

D

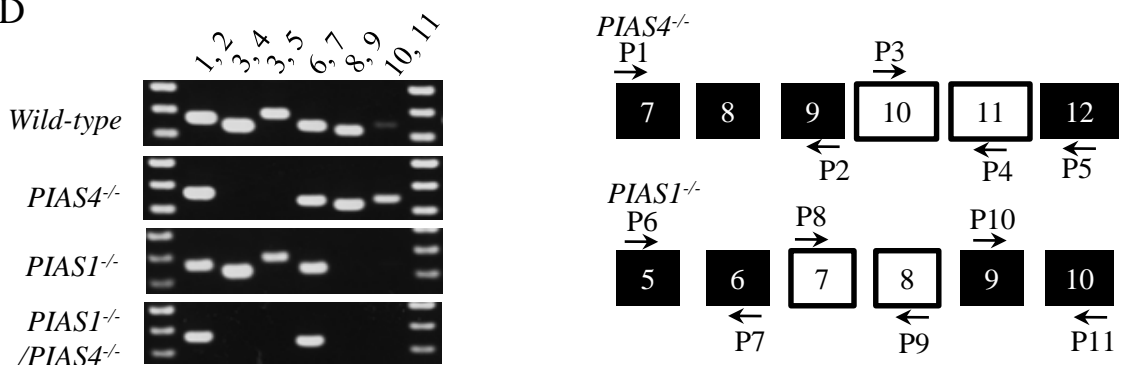

TK6

A

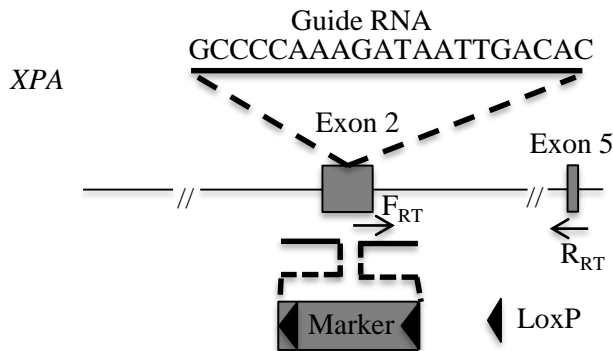

B

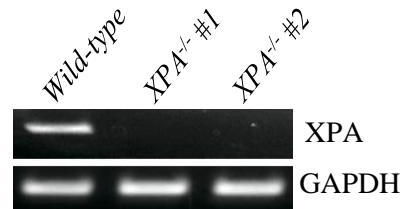

C

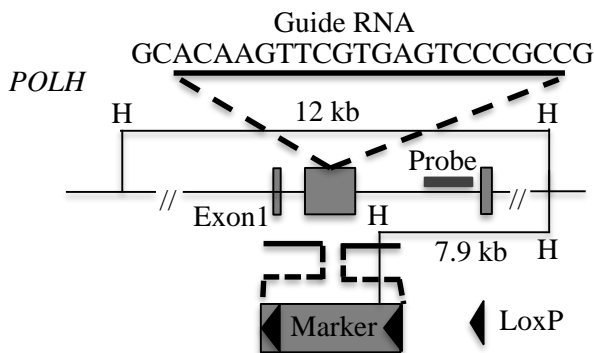

D

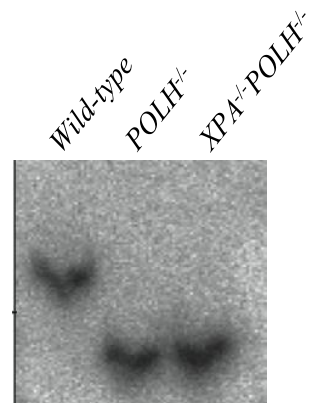

E

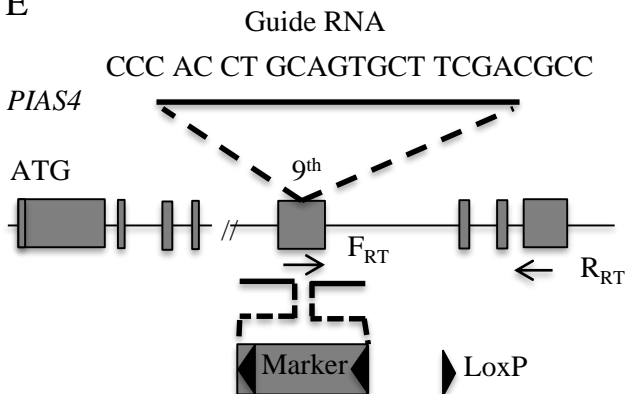

F

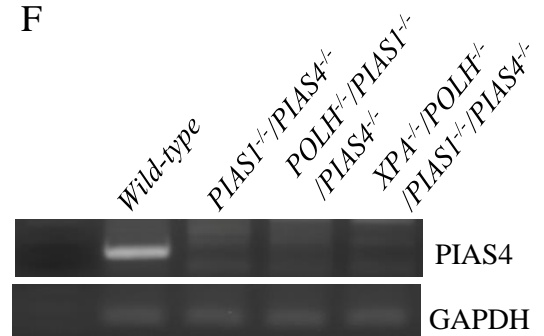

G

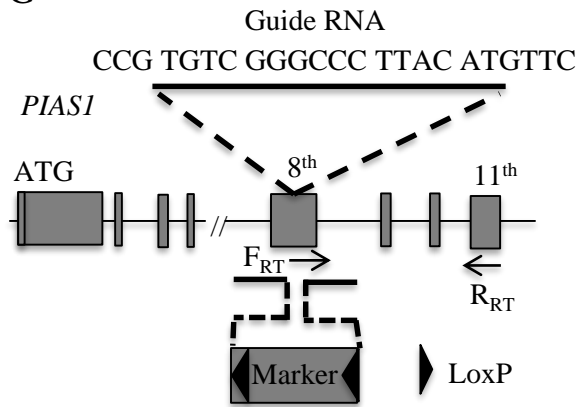

H

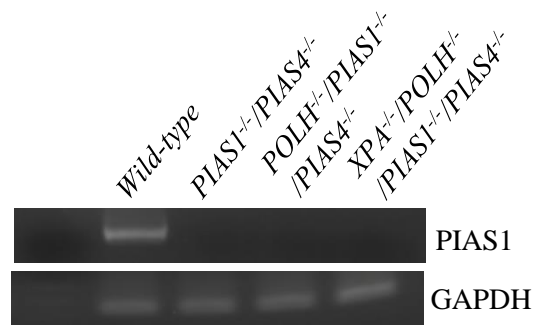

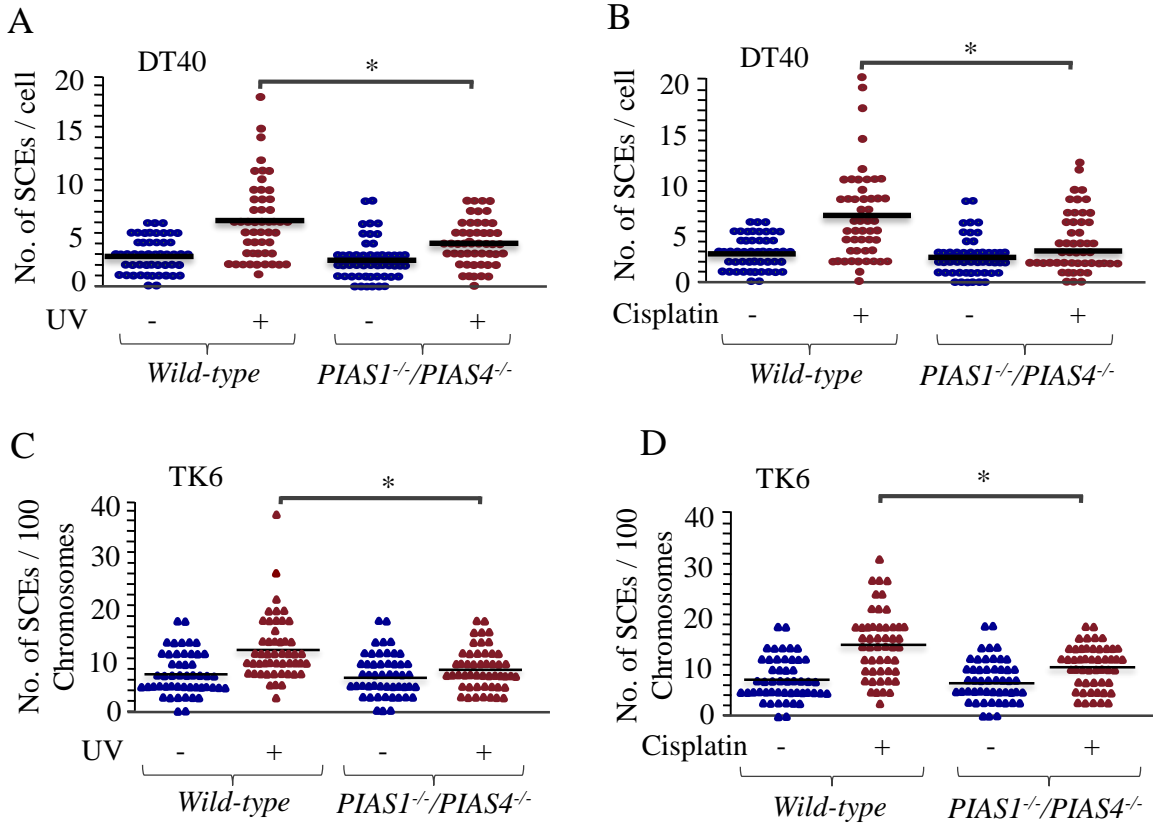

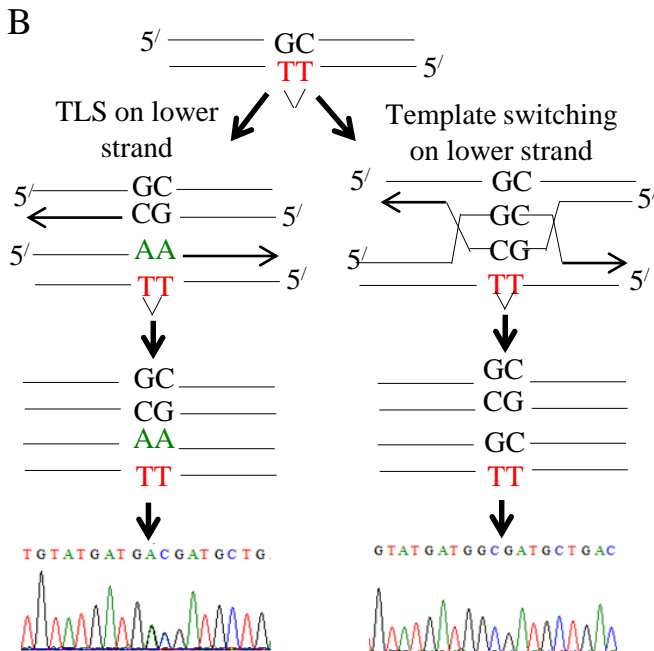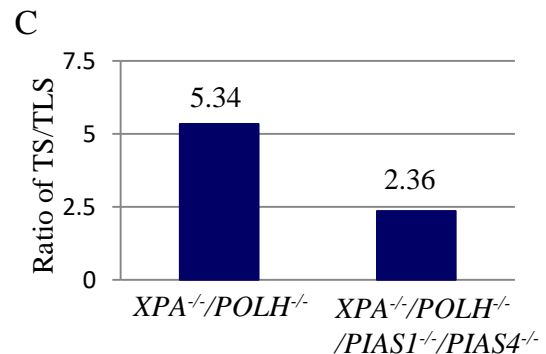

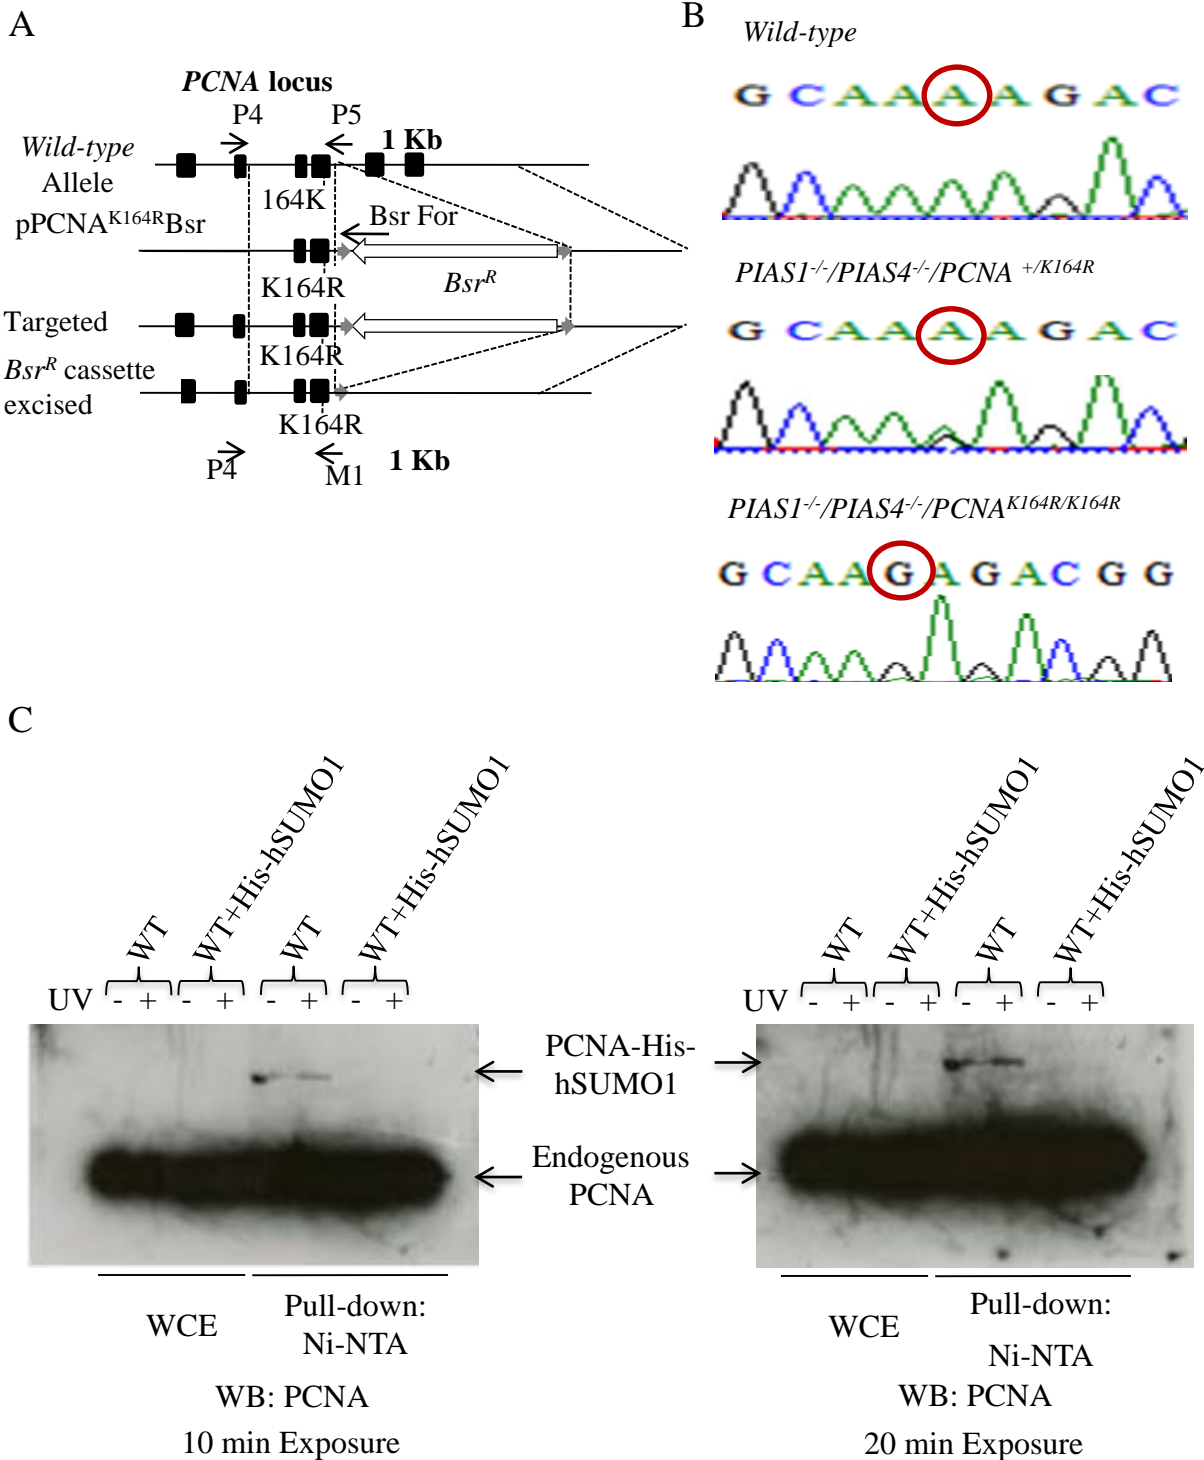

D

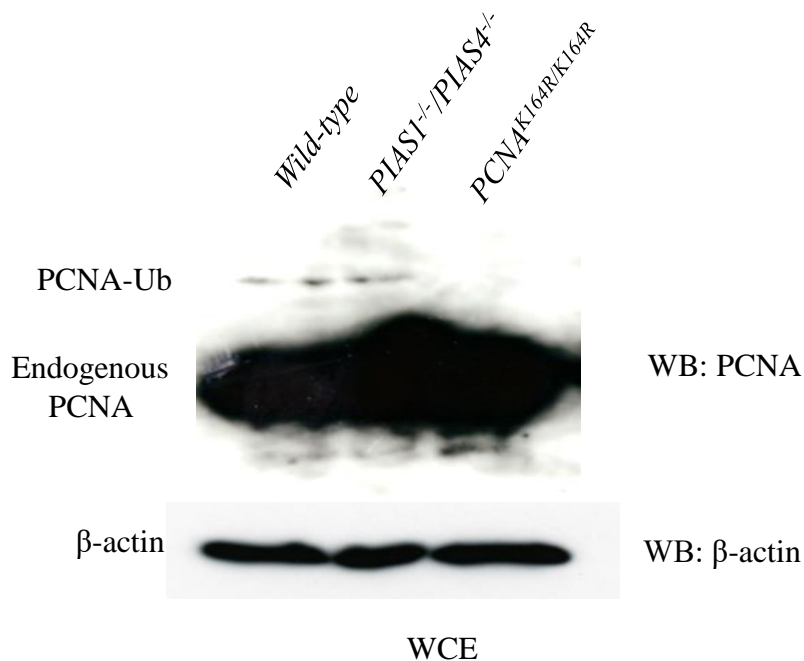

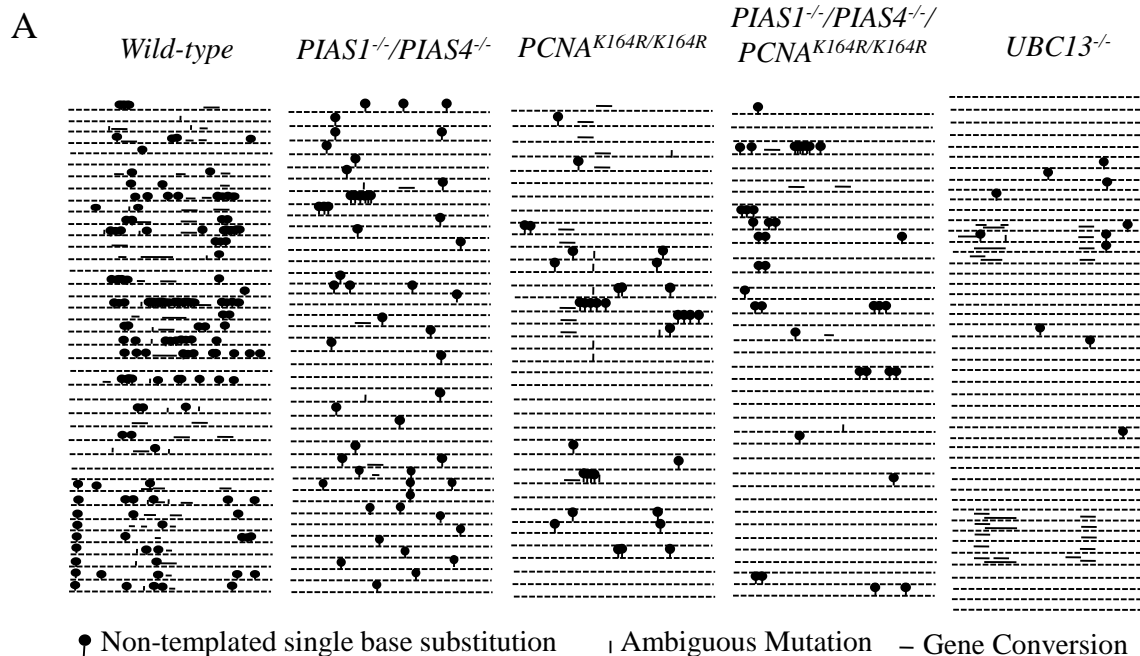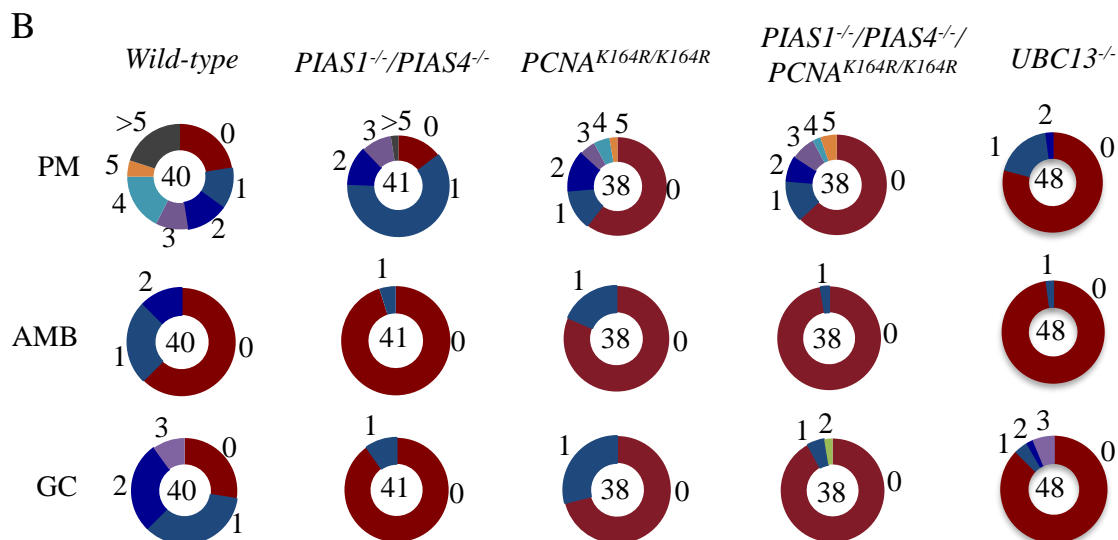

A

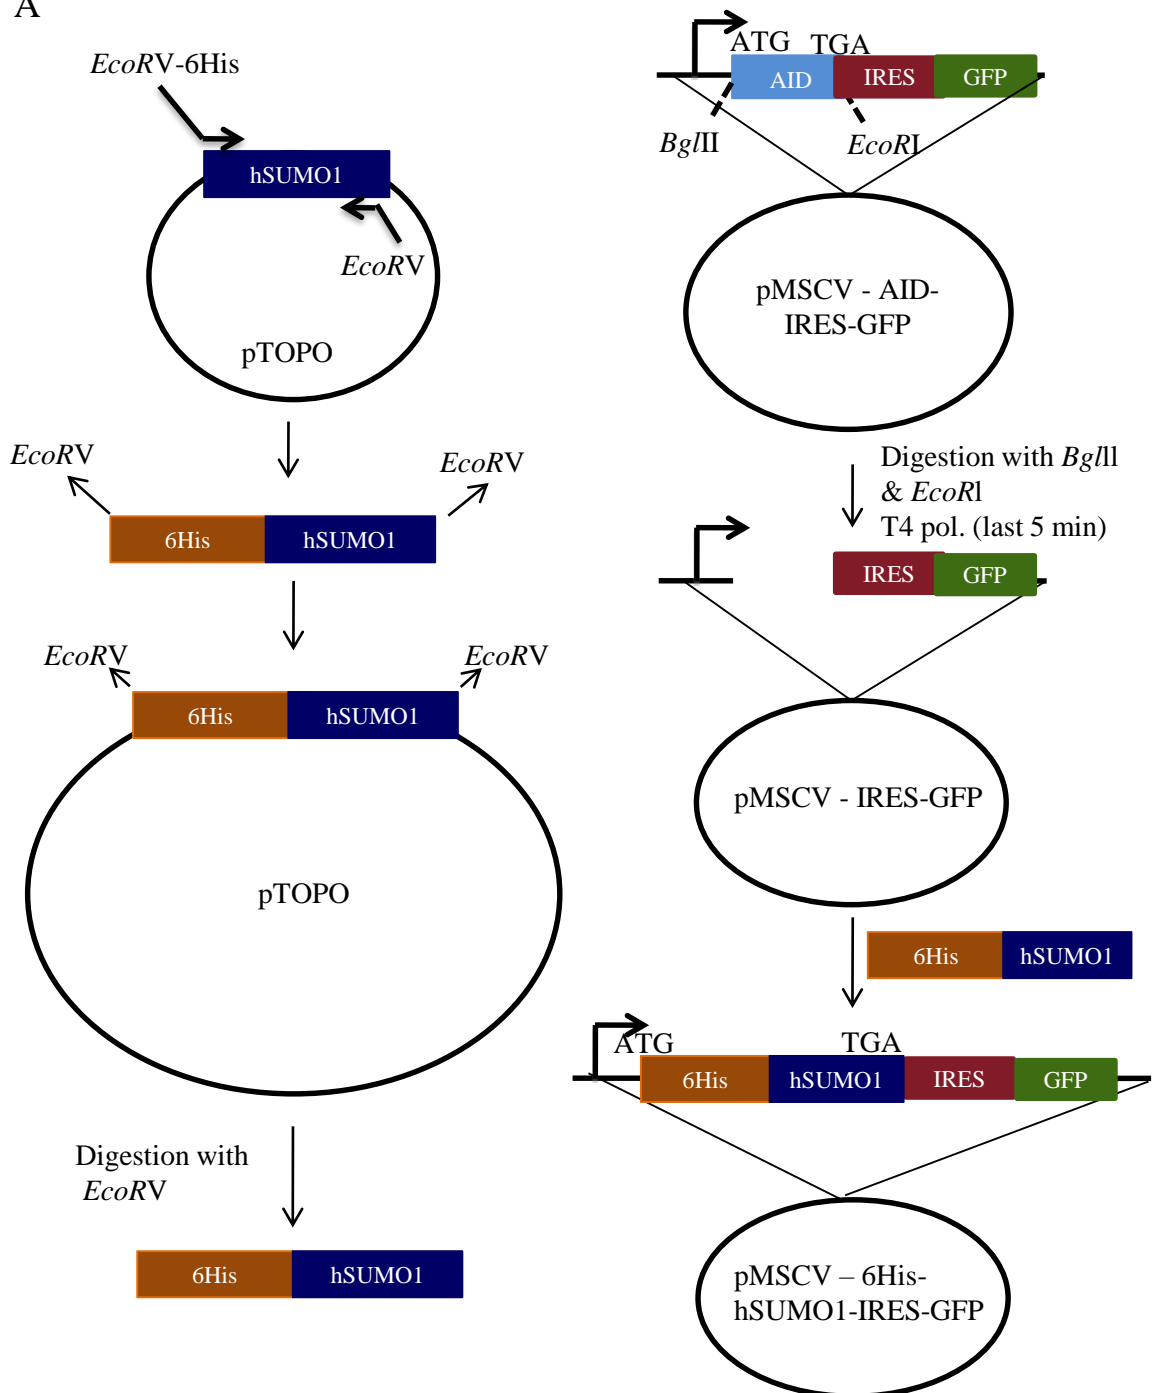

B

Human cells (293T cells)

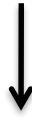

Genetically modified Retroviral expression vector  
Helper plasmid (pCLampho)

Wild-type, *PIAS1*<sup>-/-</sup>  
/*PIAS4*<sup>-/-</sup> and  
*PCNA*<sup>K164R/K164R</sup>

Viral supernatant

Wild-type cells expressing 6His-hSUMO1,  
*PIAS1*<sup>-/-</sup>/*PIAS4*<sup>-/-</sup> cells expressing 6His-hSUMO1 and  
*PCNA*<sup>K164R/K164R</sup> cells expressing 6His-hSUMO1

C

DT40

Wild-type

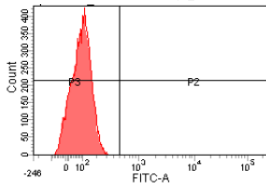

Wild-type cells expressing  
6His-hSUMO1

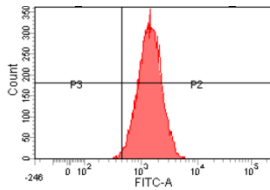

*PIAS1*<sup>-/-</sup>/*PIAS4*<sup>-/-</sup> cells  
expressing 6His-hSUMO1

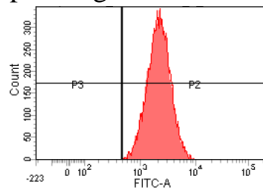

*PCNA*<sup>K164R/K164R</sup> cells  
expressing 6His-hSUMO1

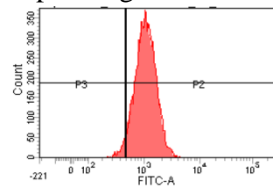

A

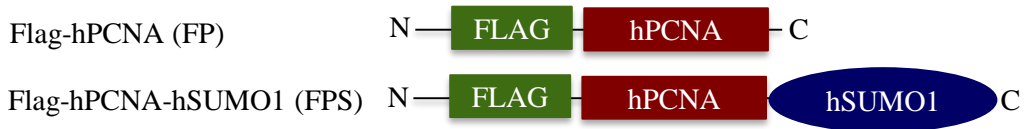

B

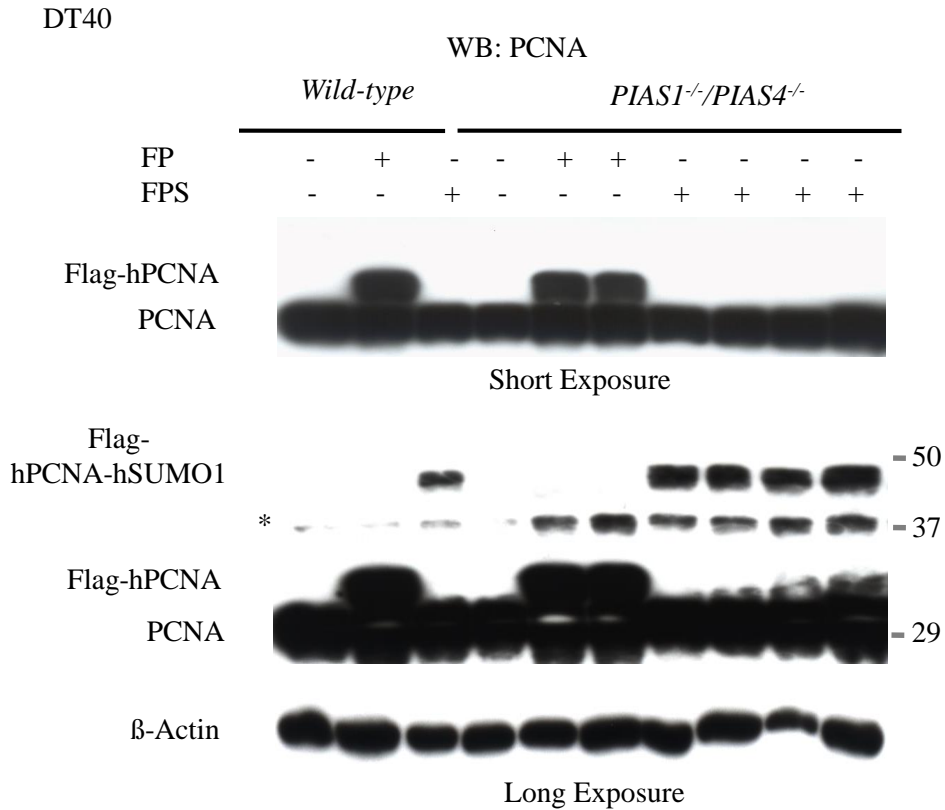

C

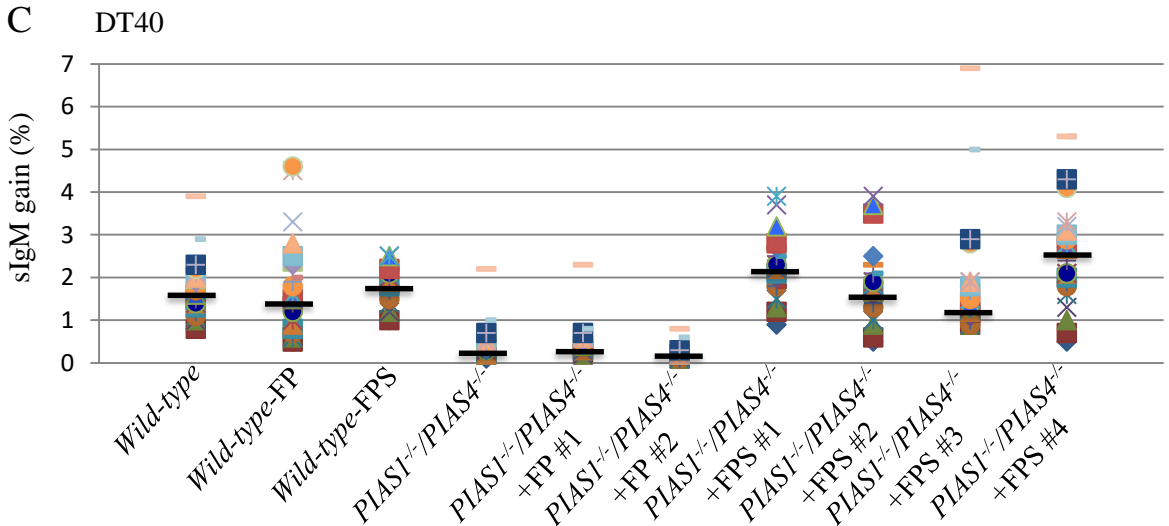

D DT40

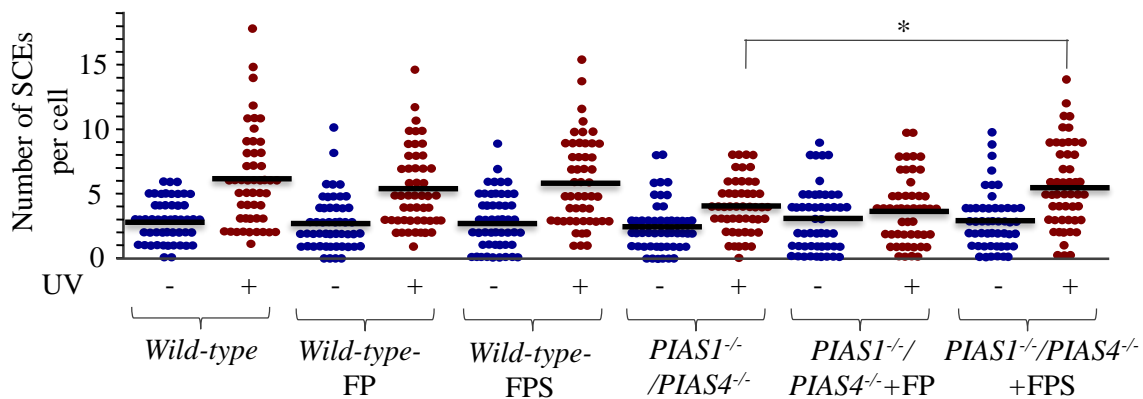

A

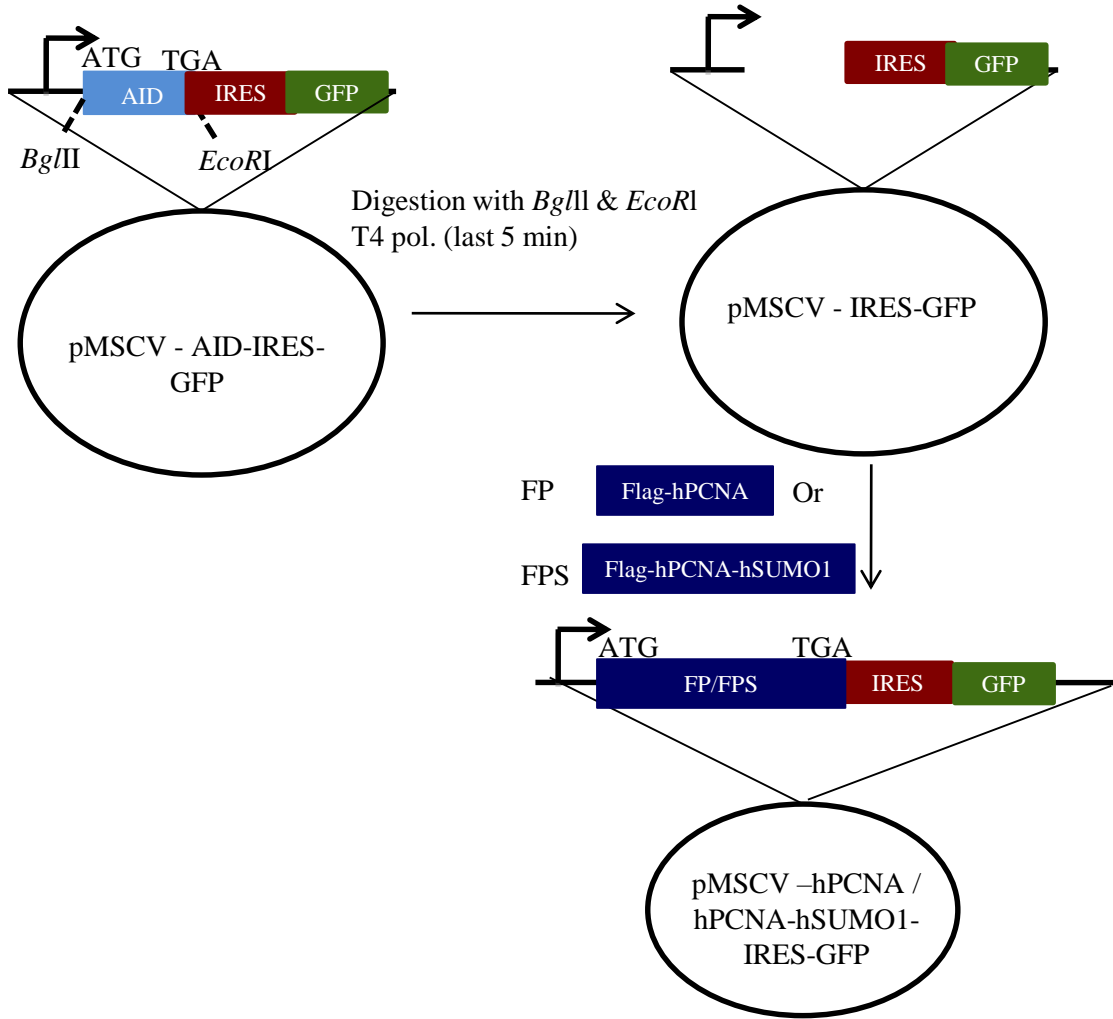

B

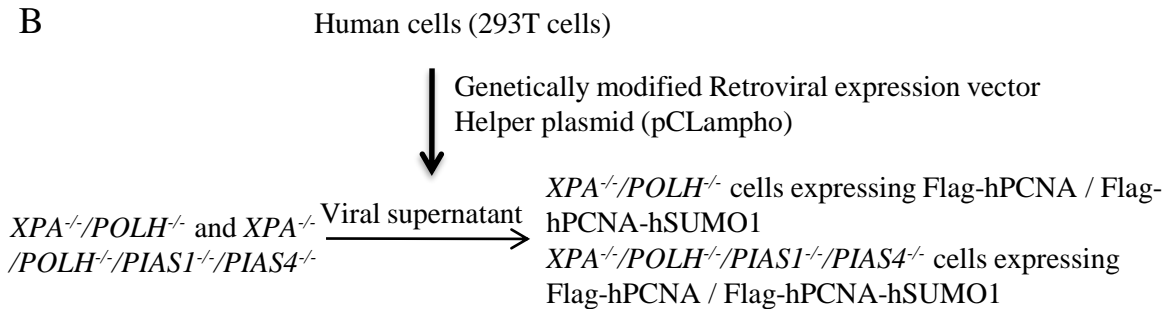

C

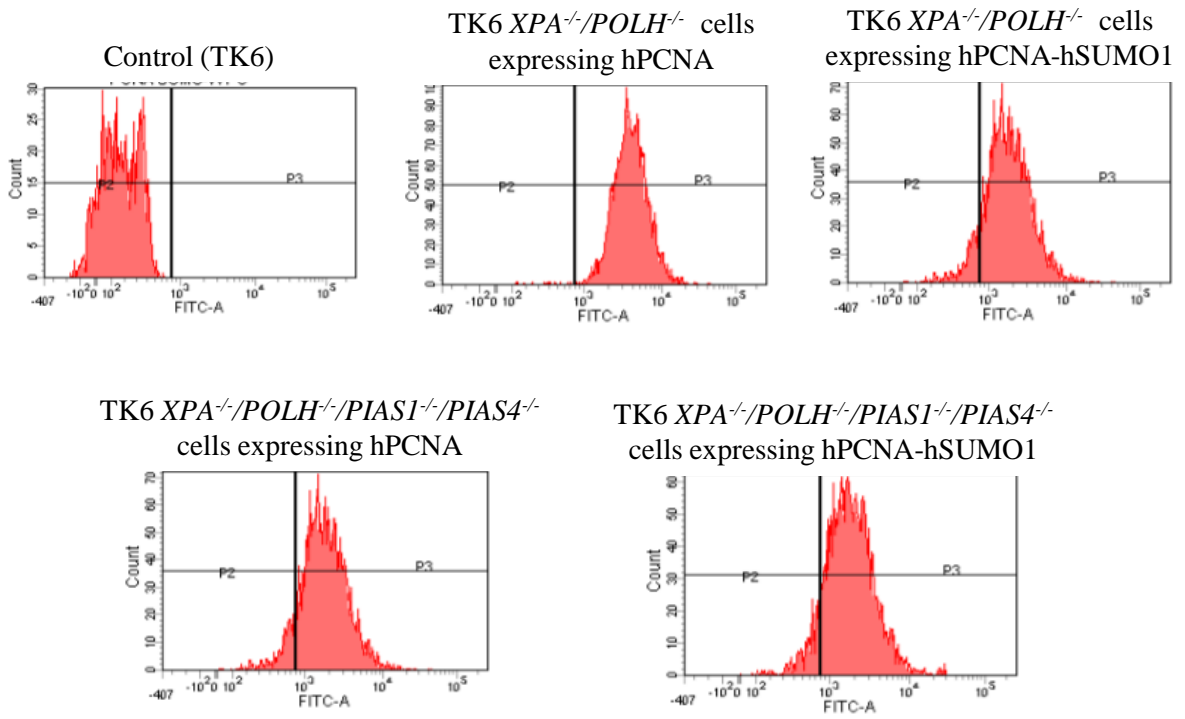

A

Flag-hPCNA-mutated hSUMO1 (FPSmut)

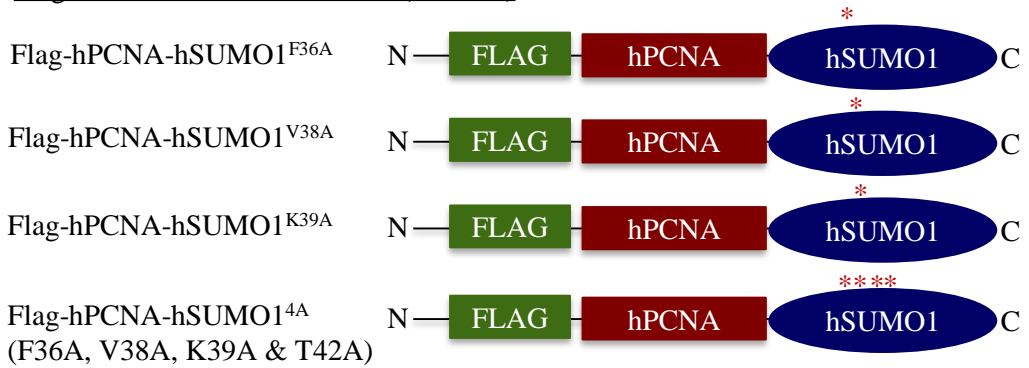

B

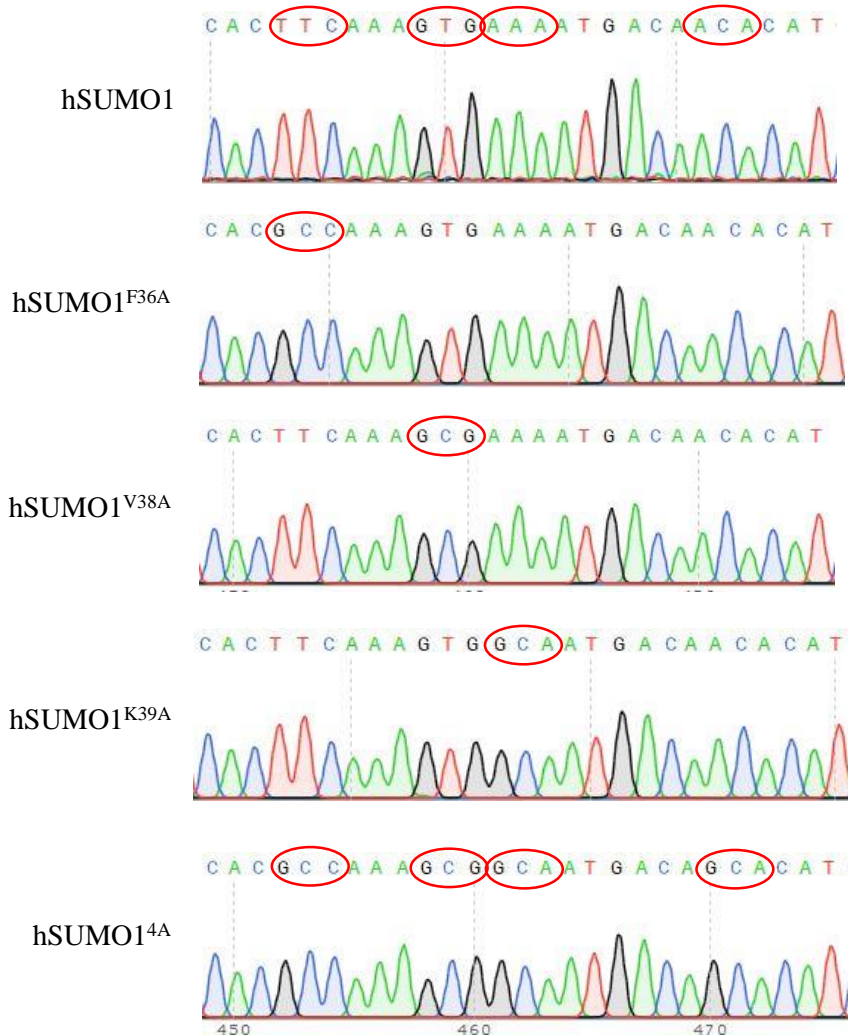

C

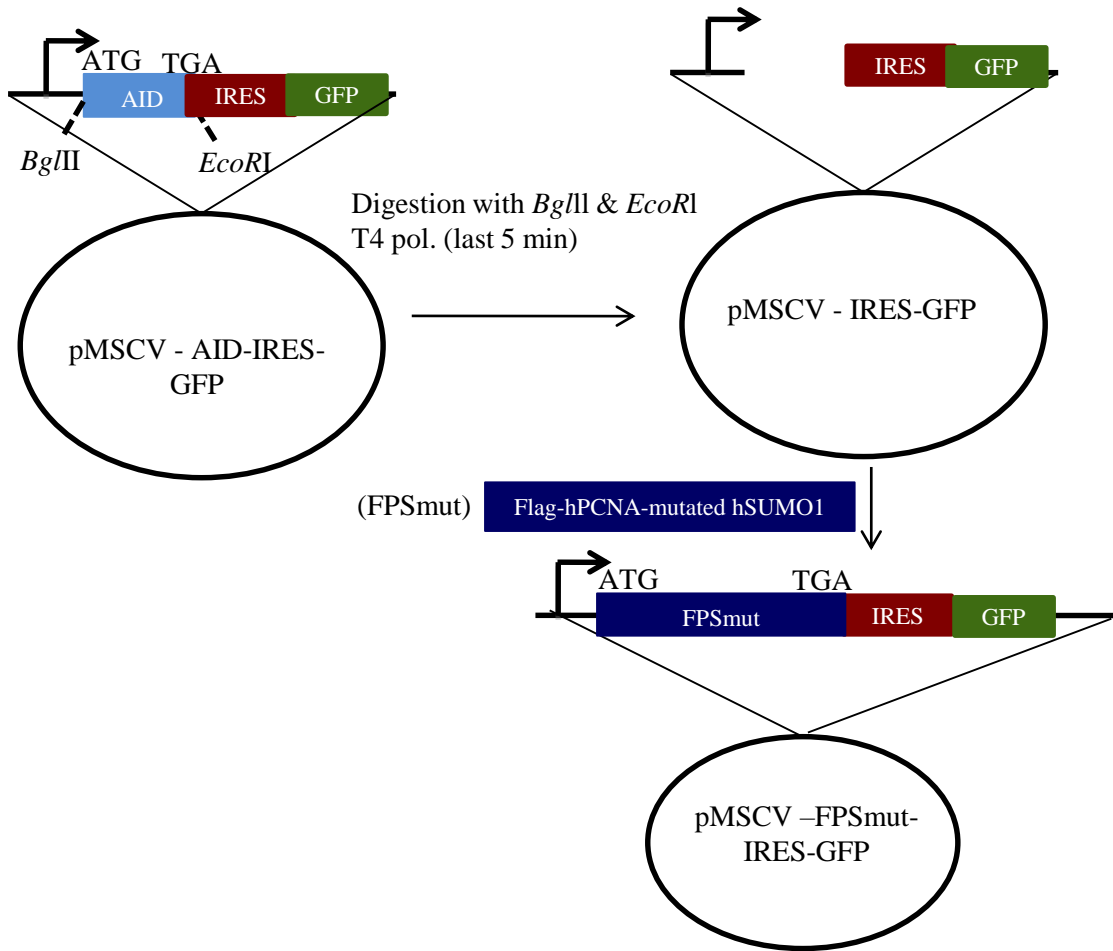

D

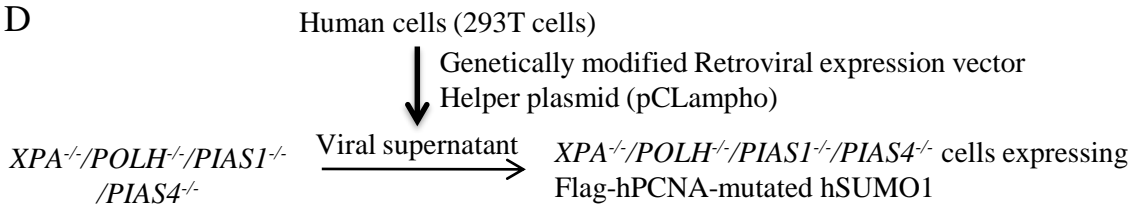

E

Control (TK6)

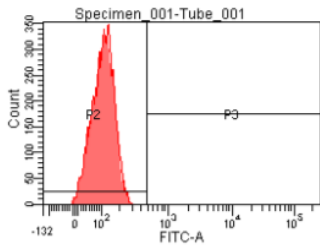

TK6  $XPA^{-/-}/POLH^{-/-}/PIAS1^{-/-}$   
/ $PIAS4^{-/-}$  cells expressing  
hPCNA-hSUMO1<sup>F36A</sup>

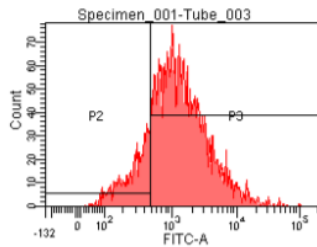

TK6  $XPA^{-/-}/POLH^{-/-}/PIAS1^{-/-}$   
/ $PIAS4^{-/-}$  cells expressing  
hPCNA-hSUMO1<sup>V38A</sup>

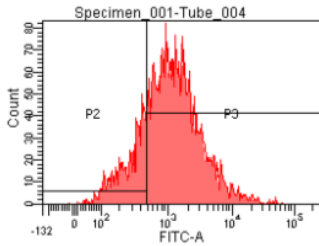

TK6  $XPA^{-/-}/POLH^{-/-}/PIAS1^{-/-}$   
/ $PIAS4^{-/-}$  cells expressing  
hPCNA-hSUMO1<sup>K39A</sup>

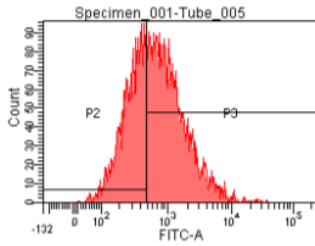

TK6  $XPA^{-/-}/POLH^{-/-}/PIAS1^{-/-}$   
/ $PIAS4^{-/-}$  cells expressing  
hPCNA-hSUMO1<sup>4A</sup>

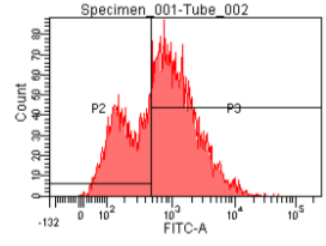

F

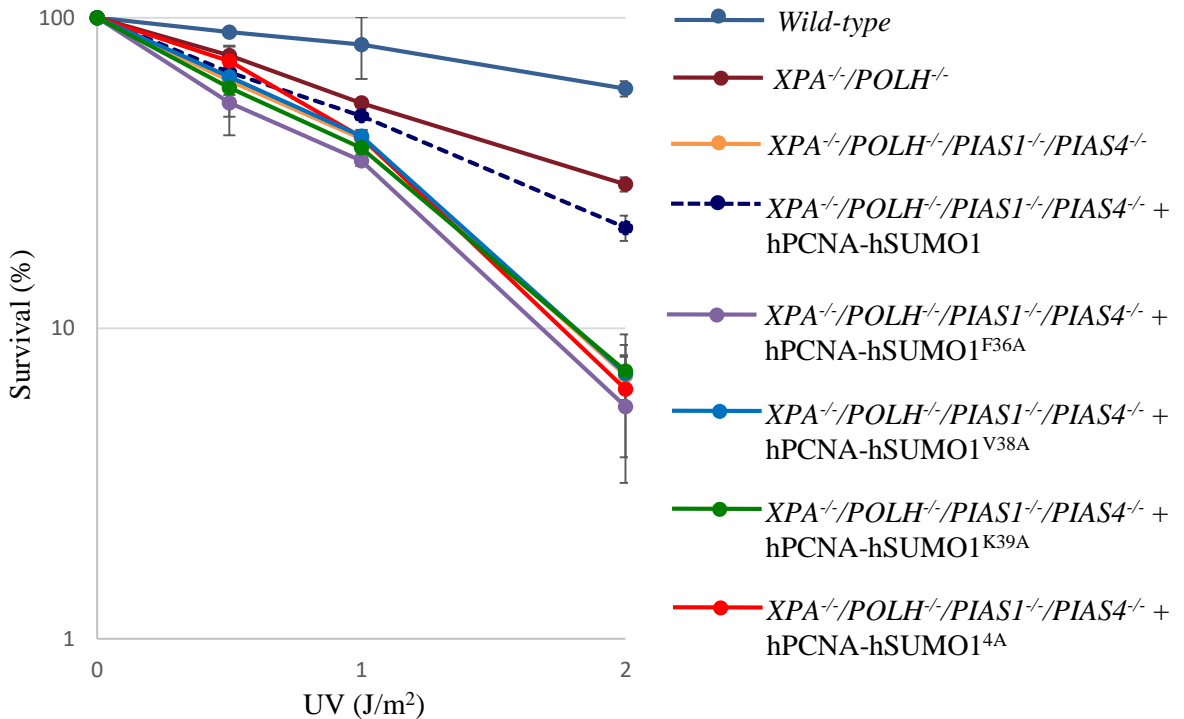

## Supplementary Tables:

**Table S1.** Panel of cell lines used in this study

| Genotype                                                                                                           | Parental Cell line | Marker genes                                                                 | References |
|--------------------------------------------------------------------------------------------------------------------|--------------------|------------------------------------------------------------------------------|------------|
| <i>PIAS1</i> <sup>-/-</sup>                                                                                        | DT40               | bsr <sup>R</sup> , puro <sup>R</sup>                                         | #          |
| <i>PIAS4</i> <sup>-/-</sup>                                                                                        | DT40               | bsr <sup>R</sup> , puro <sup>R</sup>                                         | #          |
| <i>PIAS1</i> <sup>-/-</sup> / <i>PIAS4</i> <sup>-/-</sup>                                                          | DT40               | bsr <sup>R</sup> , puro <sup>R</sup>                                         | #          |
| <i>PCNA</i> <sup>K164R/K164R</sup>                                                                                 | DT40               | bsr <sup>R</sup>                                                             | (1)        |
| <i>PIAS1</i> <sup>-/-</sup> / <i>PIAS4</i> <sup>-/-</sup> / <i>PCNA</i> <sup>K164R/K164R</sup>                     | DT40               | bsr <sup>R</sup> , puro <sup>R</sup>                                         | #          |
| <i>UBC13</i> <sup>-/-</sup>                                                                                        | DT40               | bsr <sup>R</sup> , hisD <sup>R</sup>                                         | (2)        |
| <i>PIAS1</i> <sup>-/-</sup> / <i>PIAS4</i> <sup>-/-</sup>                                                          | TK6                | bsr <sup>R</sup> , puro <sup>R</sup> hygro <sup>R</sup> , neo <sup>R</sup>   | # C        |
| <i>POLH</i> <sup>-/-</sup>                                                                                         | TK6                | -                                                                            | # C        |
| <i>XPA</i> <sup>-/-</sup> / <i>POLH</i> <sup>-/-</sup>                                                             | TK6                | -                                                                            | # C        |
| <i>POLH</i> <sup>-/-</sup> / <i>PIAS1</i> <sup>-/-</sup> / <i>PIAS4</i> <sup>-/-</sup>                             | TK6                | bsr <sup>R</sup> , hisD <sup>R</sup> , hygro <sup>R</sup> , neo <sup>R</sup> | # C        |
| <i>XPA</i> <sup>-/-</sup> / <i>POLH</i> <sup>-/-</sup> / <i>PIAS1</i> <sup>-/-</sup> / <i>PIAS4</i> <sup>-/-</sup> | TK6                | bsr <sup>R</sup> , hisD <sup>R</sup> , hygro <sup>R</sup> , neo <sup>R</sup> | # C        |

# = This study; C = CRISPR

**Table S2. Primers used in this study.**

| Primer | Sequence (5'-3')                                      |
|--------|-------------------------------------------------------|
| F1     | ATTAATCGATACTGGTTATGCGTTACAGAGTCGATATG                |
| R1     | TTAAGGATCCGGTATGCTAAGCTTTGCTATATCTGCTGGAG             |
| F2     | TTAAGGATCCGTGTTCTGGAAGGACTGAGGTGATAAGAC               |
| R2     | AATTGCGGCCGCCACAGAACTCTGTATTTCCCAAACAATGG             |
| F3     | ATTACTCGAGGTCGGTTCAGGTGGTGCTCAGGTATGTC                |
| R3     | ATTAAGATCTGCAAAGGGCAACAGAATTAACAGAAGCAAAC             |
| F4     | ATTAGGATCCGTGAGTGTGTGTGCTGCTGTCCTCGGCCC               |
| R4     | ATTA <sup>A</sup> CTAGTCAGCACTTACAGACACAGCAGTGCTCAGAG |
| RT_ P1 | GAAAGTGAACCACAGTTACTGCTCCGTGC                         |
| RT_ P2 | CAGCGCTTTGCACAGCTCTGGATGTTTG                          |

|         |                                  |
|---------|----------------------------------|
| RT_ P3  | TAAAAGAGAAGCTACGCTTGGACCCGGAC    |
| RT_ P4  | CCATCTATTATCAGCTGGTCGTAGGGCGC    |
| RT_ P5  | TCAGAGTGAGGCAGTAAACGCTCGGTGCTC   |
| RT_ P6  | GGCTATCTTCCACCAACCAAAAATGGTG     |
| RT_ P7  | TTAACGCTCTCGAGTGATCGGGGTTC       |
| RT_ P8  | TCAAAGAGAAACTGACTGCAGATCCAGACAG  |
| RT_ P9  | GAGATGTTTCATAGGGAGCCTTCTTGTCACAG |
| RT_ P10 | GTGATGAAATTCAGTTTAAGGAGGATGGCTC  |
| RT_ P11 | GATATGGAAGGACAGCTTCTCTTTGCAGAT   |
| F5      | AGTTTC CTTCTGGCTG TGGGCCTGCT G   |
| R5      | TGCTGGTTGCCTCCTCTGAGCCTGTTTC     |
| F6      | AGTTTCCTTCTGGCTGTGGGCCTGCTG      |
| R6      | ACGGAGAGCCGCATCTTCACCAGCTGT      |
| F7      | GAACGAGAAGAAGCCCACCTGGATGTGC     |
| R7      | TGCTGGTTGCCTCCTCTGAGCCTGTTTC     |
| F8      | AGAGACCTGTGCCACCTGCAGTGCTT       |
| R8      | ACGATGAGCTGTCCAGCGTGAGGTCCA      |
| F9      | AGGTTTCTGCGTGGCTTTTCTGCCTTG      |
| R9      | CCATGACTGGTCTGACATCTTTCAAGCTC    |
| F10     | AGGTTTCTGCGTGGCTTTTCTGCCTTG      |
| R10     | GCCGCATTTTACCAAGCTTTAAAAAGGGAG   |
| F11     | ACCTGGGTTTGTCTGTCTGTGATAAGAAG    |
| R11     | CCATGACTGGTCTGACATCTTTCAAGCTC    |
| F12     | TCGGGCCCTTACATGTTCTCATCTACAATG   |
| R12     | GGATACTGGAGATGCTTGATGTGGAAGACT   |
| F13     | CTCCTCTCAAGATCGAGTGA             |
| R13     | AACTCACTGCAATTATTCTA             |
| F14     | CTCCATGAGGCTAGGAACTG             |
| R14     | CAGAAGTATGTCAGGTCCTA             |
| F15     | TCTAGGTGCTTATCTTCAACTTGATCATTT   |
| R15     | ACAATAGTAACTGAAAGGGTCAATCGGCAG   |
| F16     | ACACACTCACTTCTCTTG TG            |

|     |                                 |
|-----|---------------------------------|
| R16 | GCCATGCCTACAAAAGTAAG            |
| F17 | AGTGATGCTAAATAATGCCA            |
| R17 | AGAGAAAGTGTGGTAGAAAT            |
| F18 | CAGAAAATTGGAAAAGTTGTTTCATCAACCA |
| R18 | CTTCCTTTGCTTCTTCTAATGCTTCTTGAC  |

## References

1. Arakawa H, et al. (2006) A role for PCNA ubiquitination in immunoglobulin hypermutation. *PLoS Biol.* doi:10.1371/journal.pbio.0040366.
2. Zhao GY, et al. (2007) A Critical Role for the Ubiquitin-Conjugating Enzyme Ubc13 in Initiating Homologous Recombination. *Mol Cell.* doi:10.1016/j.molcel.2007.01.029.
